# Supplementary material for: Cdk1-dependent phosphoinhibition of a formin-F-BAR interaction opposes cytokinetic contractile ring formation
Source: PubMed Central journal article supplement — Mol Biol Cell. 2018 Mar 15;29(6):713–21. doi: 10.1091/mbc.E17-11-0646 (PMC6003227; doi:10.1091/mbc.e17-11-0646), 2018-03-15
Supplement: mbc-29-713-s001.pdf [file mbc-29-713-s001.pdf]

# Supplemental Materials

*Molecular Biology of the Cell*

Willet et al.

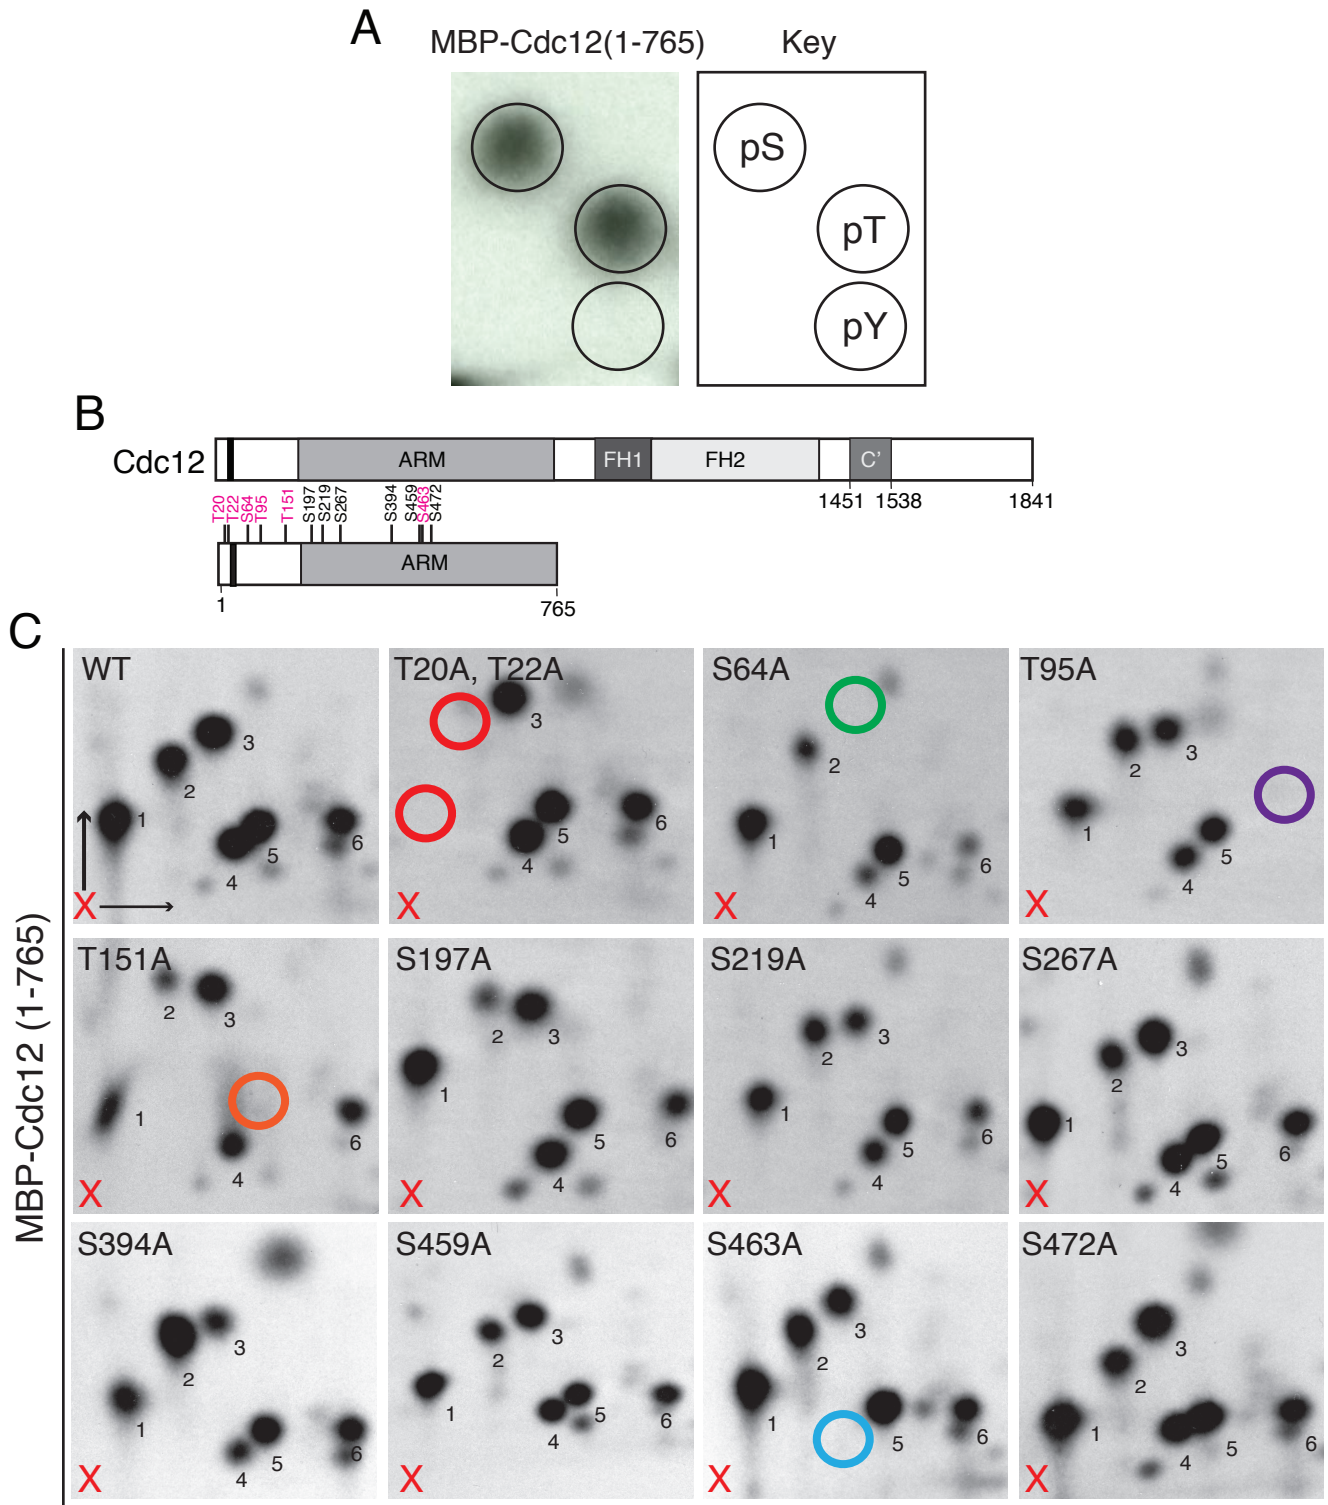

**A**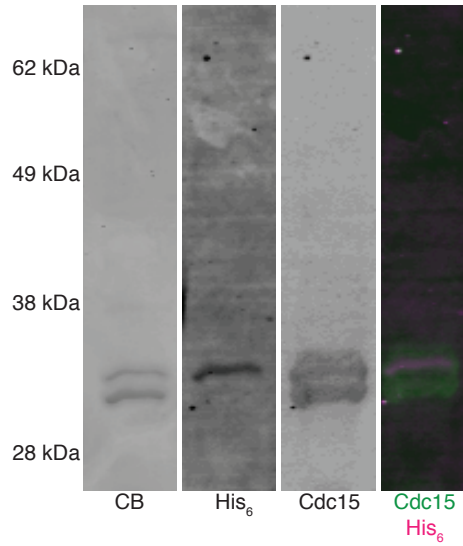**D**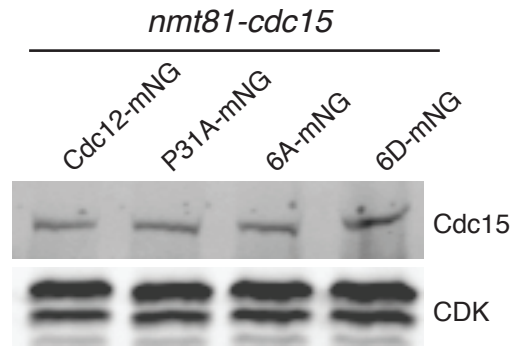**B**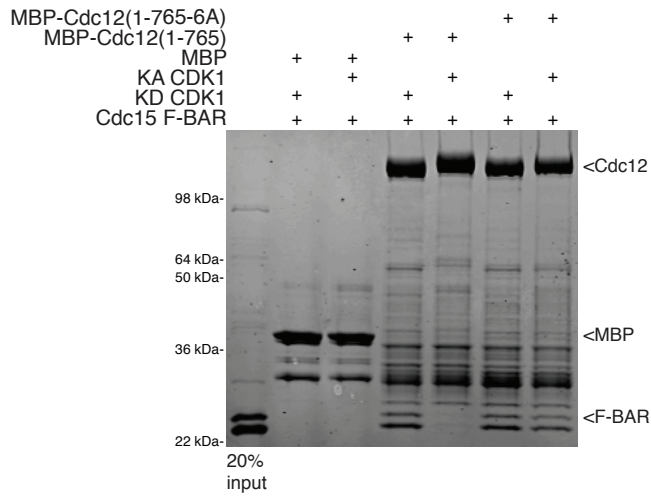**C**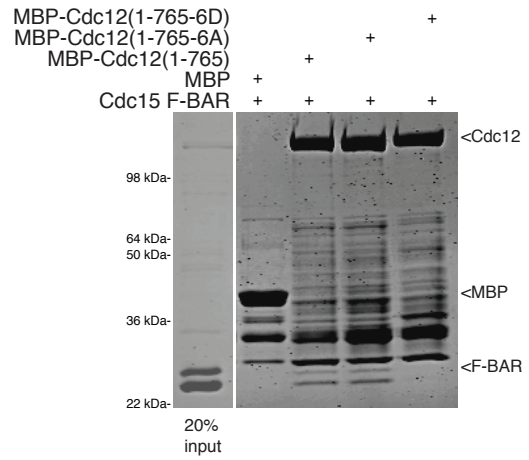

**Supplemental figure 1.** Identification of Cdk1-phosphorylated sites on Cdc12's N-terminus. (A) Phosphoamino acid analysis of the MBP-Cdc12(1-765) fragment phosphorylated by Cdk1 complex. The positions of phospho-serine, phospho-threonine and phospho-tyrosine standards are indicated in the key. (B) A schematic, drawn to scale, of full-length Cdc12 and the N-terminal fragment (1-765) with the domains indicated. All serines and threonines within S/T-P motifs are labeled and were tested in C. Residues in magenta were confirmed as the *in vitro* phosphorylated residues. (C) Phospho-tryptic peptide analysis of MBP-Cdc12(1-765) wt and mutant fragments phosphorylated by Cdk1. The positions of the origin are indicated by the red "X", and major spots are numbered. The anode is on the left. Loss of phosphorylated species for the T20A T22A, S64A, T95A, T151A and S463A mutants are indicated by red, green, purple, orange and light blue circles, respectively.

**Supplemental figure 2.** *cdc15* expression *in vivo* and *in vitro*. (A) Cdc15(19-312) resolved by SDS-PAGE and either CB stained or labeled with anti-His<sub>6</sub> (magenta) and anti-Cdc15 (green) antibodies. (B) The full CB gel of the experiment from Figure 1E. (C) The Full CB gel of the experiment from Figure 1F. (D) Expression of Cdc15 from the indicated genotypes in Figure 3D. CDK was used as a loading control.

**Supplemental Table 1. *S. pombe* strains used in this study.**

|                 | <b>Genotype</b>                                                                                                                                                          | <b>Source</b>     |
|-----------------|--------------------------------------------------------------------------------------------------------------------------------------------------------------------------|-------------------|
| <b>Figure 1</b> |                                                                                                                                                                          |                   |
| KGY246          | <i>ade6-M210 leu1-32 ura4-D18h-</i>                                                                                                                                      | Lab stock         |
| KGY3733         | <i>mts3-1 ade6-M210 leu1-32 ura4-D18 h+</i>                                                                                                                              | Lab stock         |
| KGY14891        | <i>mts3-1 cdc12-HA<sub>3</sub>:kan<sup>R</sup> ade6-M21X leu1-32 ura4-D18h-</i>                                                                                          | This study        |
| KGY18392        | <i>mts3-1 cdc12-6A-HA<sub>3</sub>:kan<sup>R</sup> ade6-M210 leu1-32 ura4-D18 h-</i>                                                                                      | This study        |
| KGY3067         | <i>cdc12-HA<sub>3</sub>:kan<sup>R</sup> ade6-M210 leu1-32 ura4-D18 h-</i>                                                                                                | Lab stock         |
| <b>Figure 2</b> |                                                                                                                                                                          |                   |
| KGY12968        | <i>cdc12-6D:kan<sup>R</sup> ade6-M210 leu1-32 ura4-D18h-</i>                                                                                                             | This study        |
| KGY6614         | <i>myo2-E1 ade6-M21X leu1-32 ura4-D18h+</i>                                                                                                                              | M.Balasubramanian |
| KGY12700        | <i>cdc12-6A:kan<sup>R</sup> ade6-M210 leu1-32 ura4-D18 h-</i>                                                                                                            | This study        |
| KGY18306        | <i>myo2-E1 cdc12-6A:kan<sup>R</sup> ade6-M21X leu1-32 ura4-D18h+</i>                                                                                                     | This study        |
| KGY6614         | <i>rng2-D5 ade6-M21X leu1-32 ura4-D18h+</i>                                                                                                                              | Lab stock         |
| KGY14978        | <i>rng2-D5 cdc12-6A:kan<sup>R</sup> ade6-M21X leu1-32 ura4-D18h-</i>                                                                                                     | This study        |
| KGY18304        | <i>rng2-D5 cdc12-6D:kan<sup>R</sup> ade6-M21X leu1-32 ura4-D18h+</i>                                                                                                     | This study        |
| KGY2711         | <i>mid1::ura4<sup>+</sup>ade6-M210 leu1-32 ura4-D18 h+</i>                                                                                                               | Lab stock         |
| KGY18303        | <i>mid1::ura4<sup>+</sup>cdc12-6A:kan<sup>R</sup> ade6-M21X leu1-32 ura4-D18h+</i><br><i>mid1::ura4<sup>+</sup>cdc12-6D:kan<sup>R</sup> ade6-M21X leu1-32 ura4-D18h+</i> | This study        |
| KGY18305        | <i>cdc15-140 ade6-M210 leu1-32 ura4-D18 h+</i><br><i>cdc15-140 cdc12-6A:kan<sup>R</sup> ade6-M210 leu1-32 ura4-D18h-</i>                                                 | This study        |
| KGY1008         | <i>cdc15-140 cdc12-6D:kan<sup>R</sup> ade6-M210 leu1-32 ura4-D18h+</i>                                                                                                   | Lab stock         |
| KGY18177        |                                                                                                                                                                          | This study        |

KGY18238 This study

### Figure 3

KGY16917 *cdc12-mNG:kan<sup>R</sup> sid4-GFP:kan<sup>R</sup> ade6-M210 leu1-32 ura4-D18h-* This study

KGY2341-2 *cdc12-P31A-mNG:kan<sup>R</sup> sid4-GFP:kan<sup>R</sup> ade6-M210 leu1-32 ura4-D18 h-* This study

KGY2373-2 *cdc12-6D-mNG:kan<sup>R</sup> sid4-GFP:kan<sup>R</sup> ade6-M210 leu1-32 ura4-D18h+* This study

KGY2405-2 *cdc12-6A-mNG:kan<sup>R</sup> sid4-GFP:kan<sup>R</sup> ade6-M210 leu1-32 ura4-D18h+* This study

KGY17015 *cdc25-22 cdc15-11A cdc12-mNG:kan<sup>R</sup> ade6-M210 leu1-32 ura4-D18 h-* Lab stock

KGY2402-2 *cdc25-22 cdc15-11A cdc12-P31A-mNG:kan<sup>R</sup> ade6-M210 leu1-32 ura4-D18 h+* This study

KGY2410-2 *cdc25-22 cdc15-11A cdc12-6D-mNG:kan<sup>R</sup> ade6-M210 leu1-32 ura4-D18 h+* This study

KGY2412-2 *cdc25-22 cdc15-11A cdc12-6A-mNG:kan<sup>R</sup> ade6-M210 leu1-32 ura4-D18h-* This study

### Figure 4

KGY15739 *pAct1 LifeAct-mCherry:leu1<sup>+</sup> sid4-GFP:kan<sup>R</sup> ade6-M216 leu1-32 ura4-D18h-* Lab stock

KGY16615 *cdc12-P31A:kan<sup>R</sup> pAct1 LifeAct-mCherry:leu1<sup>+</sup> sid4-GFP:kan<sup>R</sup> ade6-M216 leu1-32 ura4-D18 h+* Lab stock

|          |                                                                                                                               |            |
|----------|-------------------------------------------------------------------------------------------------------------------------------|------------|
| KGY18368 | <i>cdc12-6D:kan<sup>R</sup> pAct1 LifeAct-mCherry:leu1<sup>+</sup> sid4-GFP:kan<sup>R</sup> ade6-M216 leu1-32 ura4-D18h+</i>  | This study |
| KGY18240 | <i>cdc12-6A:kan<sup>R</sup> pAct1 LifeAct-mCherry:leu1<sup>+</sup> sid4-GFP:kan<sup>R</sup> ade6-M216 leu1-32 ura4-D18 h+</i> | This study |
| KGY16700 | <i>mCherry-cdc15 sid4-RFP:kan<sup>R</sup> ade6-M21X leu1-32 ura4-D18h+</i>                                                    | Lab stock  |
| KGY16718 | <i>cdc12-P31A:kan<sup>R</sup> mCherry-cdc15 sid4-RFP:kan<sup>R</sup> ade6-M21X leu1-32 ura4-D18 h+</i>                        | Lab stock  |
| KGY18626 | <i>cdc12-6D:kan<sup>R</sup> mCherry-cdc15 sid4-RFP:kan<sup>R</sup> ade6-M21X leu1-32 ura4-D18 h-</i>                          | This study |
| KGY18625 | <i>cdc12-6A:kan<sup>R</sup> mCherry-cdc15 sid4-RFP:kan<sup>R</sup> ade6-M21X leu1-32 ura4-D18 h+</i>                          | This study |
| KGY16924 | <i>ain1-GFP:kan<sup>R</sup> sid4-GFP:kan<sup>R</sup> ade6-M21X leu1-32 ura4-D18h-</i>                                         | Lab stock  |
| KGY16903 | <i>cdc12-P31A:kan<sup>R</sup> ain1-GFP:kan<sup>R</sup> sid4-GFP:kan<sup>R</sup> ade6-M21X leu1-32 ura4-D18h-</i>              | Lab stock  |
| KGY18621 | <i>cdc12-6D:kan<sup>R</sup> ain1-GFP:kan<sup>R</sup> sid4-GFP:kan<sup>R</sup> ade6-M21X leu1-32 ura4-D18h+</i>                | This study |
| KGY18668 | <i>cdc12-6A:kan<sup>R</sup> ain1-GFP:kan<sup>R</sup> sid4-GFP:kan<sup>R</sup> ade6-M21X leu1-32 ura4-D18h+</i>                | This study |

### Figure 5

|         |                                                                                       |           |
|---------|---------------------------------------------------------------------------------------|-----------|
| KGY7450 | <i>rlc1-GFP:ura<sup>+</sup> sid4-GFP:kan<sup>R</sup> ade6-M21X leu1-32 ura4-D18h-</i> | Lab stock |
|---------|---------------------------------------------------------------------------------------|-----------|

|          |                                                                                                                            |            |
|----------|----------------------------------------------------------------------------------------------------------------------------|------------|
| KGY15636 | <i>cdc12-P31A:kan<sup>R</sup> rlc1-GFP:ura<sup>+</sup> sid4-GFP:kan<sup>R</sup> ade6-M21X</i><br><i>leu1-32 ura4-D18h-</i> | Lab stock  |
| KGY18132 | <i>cdc12-6D:kan<sup>R</sup> rlc1-GFP:ura4<sup>+</sup> sid4-GFP:kan<sup>R</sup> ade6-M21X</i><br><i>leu1-32 ura4-D18h-</i>  | This study |
| KGY18217 | <i>cdc12-6A:kan<sup>R</sup> rlc1-GFP:ura4<sup>+</sup> sid4-GFP:kan<sup>R</sup> ade6-M21X</i><br><i>leu1-32 ura4-D18h+</i>  | This study |
